# Supplementary material
Source: HighWire-hosted journal article supplement (http://www.qdcxjkg.com/highwire/filestream/131174/field_highwire_adjunct_files/0/ERJ-01967-2015_supplement1.pdf)
Supplement: ERJ-01967-2015_supplement1.pdf [file ERJ-01967-2015_supplement1.pdf]

## **Online Supplement 1**

**Section 1: Additional information regarding health care administrative databases used**

**Section 2: Propensity score weighting methods**

**Section 3: Conversion of different opioid drug doses into mg of morphine equivalents per day**

**Section 4: Additional sensitivity analysis for community-dwelling cohort**

## **Section 1: Additional information regarding health care administrative databases used**

Regarding the Institute for Clinical Evaluative Sciences (ICES) COPD database, COPD health administrative codes were previously validated against an expert respirology panel review of patient medical charts [1]. All patient chart information, including history, physical examination, and investigations, were considered by the expert panel [1]. In addition to the ICES COPD database and the Ontario Drug Benefit (ODB) database, ten other standard health care administrative databases were linked, similar to previous [2], at an individual patient-level in order to identify COPD exacerbations and comorbidities. The Ontario Health Insurance Plan (OHIP) database was used, as it contained information on patient contact by physicians in both ambulatory and hospital settings. The Canadian Institute for Health Information Discharge Abstract Database (CIHI-DAD) was used, because it contained information on all hospital admissions. The National Ambulatory Care Reporting System (NACRS) database captured information on all emergency room (ER) visits. Comorbidities were also identified using the Ontario Mental Health Reporting System (containing information on all mental health hospital admissions), the Same-Day Surgery database (containing information on surgical procedures not requiring overnight hospital stays), the Ontario Cancer Registry (a validated provincial cancer registry [3]), and an established validated database of Ontario adults with physician-diagnosed congestive heart failure [4]. Demographic and mortality data were obtained from the Registered Persons Database (RPDB) and cause of death data were obtained from the Office of the Registrar General - Deaths (ORGD) database.

## References

1. Gershon AS, Wang C, Guan J, Vasilevska-Ristovska J, Cicutto L, To T. Identifying individuals with physician diagnosed COPD in health administrative databases. *J COPD* 2009; 6: 388-394.
2. Vozoris NT, Wang X, Fischer HD, Gershon AS, Bell CM, Gill SS, O'Donnell DE, Austin PC, Stephenson AL, Rochon PA. Incident opioid drug use among older adults with chronic obstructive pulmonary disease: a population-based cohort study. *Br J Clin Pharmacol* 2016; 81: 161-70.
3. Robles SC, Marrett LD, Clarke EA, Risch HA (1988) An application of capture-recapture methods to the estimation of completeness of cancer registration. *J Clin Epidemiol* 41:495-501.
4. Gershon AS, Warner L, Cascagnette P, Victor JC, To T (2011) Lifetime risk of developing chronic obstructive pulmonary disease: a longitudinal population study. *Lancet* 378:991-996.

## **Section 2: Propensity score weighting methods**

Since there are significant differences in risk for opioid drug exposure among older adult with COPD [1], inverse probability of treatment weighting using the propensity score was employed to create weighted samples of exposed and control individuals where measured baseline covariates were balanced between the two groups [2-3]. The propensity score reflected the probability of receiving a new opioid for an individual with a specific set of measured baseline factors. A propensity score for new opioid receipt was developed using a logistic regression model with 33 covariates describing patient demographic and health characteristics that were known to be associated with opioid receipt in older adults with COPD [1] and the outcomes of interest (Table 2 in manuscript proper). Indicators of COPD severity, health care utilization, and comorbidities were included in the propensity score.

As clinical items such as respiratory symptoms and pulmonary function were not available in our health administrative databases for inclusion in the propensity score, COPD severity was assessed using other measures, like COPD exacerbation history in the year prior to the index, COPD duration, and use of respiratory-related medications. Canadian [4] and newer global [5] COPD guidelines use COPD exacerbation frequency to distinguish COPD severity. COPD exacerbation history is known to be associated with severity of underlying airflow obstruction [6], risk of future exacerbations [7] and mortality [8], and it is the single best predictor of future exacerbation, regardless of baseline lung function [7]. A cut-off of 1 or more exacerbations in the preceding year was used, as Canadian COPD guidelines use this cut-off [4]. Among individuals who had 1 or more COPD exacerbation in the year prior to index, we separately considered whether the exacerbation(s) were or were not all associated with presentation to hospital, since presenting to hospital likely reflects an exacerbation of greater

severity. Respiratory exacerbations associated with presentation to hospital were defined as an ER visit or a hospitalization for COPD or pneumonia. Respiratory exacerbations not associated with presentation to hospital (i.e., outpatient exacerbations) were defined as receipt of an oral corticosteroid or respiratory antibiotic within +/-7 days of a physician clinic/office visit for COPD or pneumonia and with the corticosteroid or antibiotic prescription having a supply date of 5-21 days. Others have used a similar definition for non-hospital associated respiratory exacerbation [7,9]. Whether or not individuals had had a COPD exacerbation in the 30 days prior to index was also included as covariate in the propensity score. This variable was included to balance opioid users and controls on a marker of recent respiratory status stability at the time of the index date.

## References

1. Vozoris NT, Wang X, Fischer HD, Gershon AS, Bell CM, Gill SS, O'Donnell DE, Austin PC, Stephenson AL, Rochon PA. Incident opioid drug use among older adults with chronic obstructive pulmonary disease: a population-based cohort study. *Br J Clin Pharmacol* 2016; 81: 161-70.
2. Austin PC. An Introduction to Propensity Score Methods for Reducing the Effects of Confounding in Observational Studies. *Multivariate Behav Res.* 2011; 46(3):399-424.

3. Austin PC, Stuart EA. Moving towards best practice when using inverse probability of treatment weighting (IPTW) using the propensity score to estimate causal treatment effects in observational studies. *Stat Med*. In press. doi: 10.1002/sim.6607.
4. Global Initiative for Chronic Obstructive Lung Disease (GOLD). Global Strategy for the Diagnosis, Management, and Prevention of Chronic Obstructive Pulmonary Disease. 2014. [http://www.goldcopd.com/uploads/users/files/GOLD\\_Report\\_2014\\_Oct30.pdf](http://www.goldcopd.com/uploads/users/files/GOLD_Report_2014_Oct30.pdf) (Accessed January 2015).
5. O'Donnell DE, Hernandez P, Kaplan A, Aaron S, Bourbeau J, Marciniuk D, Balter M, Ford G, Gervais A, Lacasse Y, Maltais F, Road J, Rocker G, Sin D, Sinuff T, Voduc N. Canadian Thoracic Society recommendations for management of chronic obstructive pulmonary disease – 2008 update – highlights for primary care. *Can Resp J* 2008; 15S: 1A-8A.
6. Donaldson GC, Seemungal TA, Bhowmik A, Wedzicha JA. Relationship between exacerbation frequency and lung function decline in chronic obstructive pulmonary disease. *Thorax* 2002; 57: 847-852.
7. Hurst JR, Vestbo J, Anzueto A, Locantore N, Müllerova H, Tal-Singer R, Miller B, Lomas DA, Agusti A, Macnee W, Calverley P, Rennard S, Wouters EF, Wedzicha JA; Evaluation of COPD Longitudinally to Identify Predictive Surrogate Endpoints (ECLIPSE) Investigators. Susceptibility to exacerbation in chronic obstructive pulmonary disease. *N Engl J Med* 2010; 363: 1128-1138.

8. Connors AF Jr, Dawson NV, Thomas C, Harrell FE Jr, Desbiens N, Fulkerson WJ, Kussin P, Bellamy P, Goldman L, Knaus WA. Outcomes following acute exacerbation of severe chronic obstructive lung disease. The SUPPORT investigators (Study to Understand Prognoses and Preferences for Outcomes and Risks of Treatments). *Am J Respir Crit Care Med* 1996; 154: 959-67.
  
9. Donaldson GC, Hurst JR, Smith CJ, Hubbard RB, Wedzicha JA. Increased risk of myocardial infarction and stroke following exacerbation of COPD. *Chest* 2010; 137(5): 1091-7.

### Section 3: Conversion of different opioid drug doses into mg of morphine equivalents per day

Morphine equivalents were calculated based on the data in the following table [1], by dividing the daily dose of the non-morphine formulation by the appropriate number from the list below.

| Opioid type                        | mg morphine equivalents |
|------------------------------------|-------------------------|
| Morphine sulphate or HCL           | 1*                      |
| Anileridine                        | 1.25                    |
| Codeine sulphate or phosphate      | 3.33                    |
| Hydromorphone HCL                  | 0.125                   |
| Levorphanol                        | 0.067                   |
| Meperidine                         | 5                       |
| Oxycodone                          | 0.25                    |
| Propoxyphene or Dextropropoxyphene | 1.67                    |
| Transdermal fentanyl               | 0.42                    |

\*Assuming non-chronic dosing, which applies to our study that examines new opioid use.

### References

1. Canadian Pharmacists Association. Compendium of Pharmaceuticals and Specialties. Ottawa, Canada, Canadian Pharmacists Association, 2013. pp.1739.



#### **Section 4: Additional sensitivity analysis for community-dwelling cohort**

We performed three additional sensitivity analysis. We examined for adverse outcomes distinguishing by whether or not the incident opioid contained a caffeine component. Two opioid drugs available in ODB contain a caffeine component, acetaminophen-caffeine-codeine and acetylsalicylic acid-codeine-caffeine. The intention of the caffeine component is to potentially counteract opioid-related sedating side-effects. The purpose of this sensitivity analysis was to evaluate if the association with adverse outcomes would be different between opioids that contain and do not contain a caffeine component. We also evaluated for adverse respiratory outcomes after excluding individuals with a lung cancer diagnosis within five years prior to the index date and separately after excluding individuals with any cancer diagnoses within five years prior to the index date. The purpose of these final two sensitivity analyses was to examine the association between new opioid use and adverse respiratory outcomes after additionally minimizing the potential for confounding by indication by the presence of comorbid malignancy.

Compared to controls, new users of non-caffeine-containing opioids were associated with significantly increased risk of ER visits (HR 1.31, 95% CI 1.12-1.54) and hospitalizations for COPD or pneumonia (HR 1.27, 95% CI 1.10-1.45), as well as increased COPD or pneumonia-related mortality (HR 3.21, 95% CI 2.35-4.40) and all-cause mortality (HR 2.79, 95% CI 2.46-3.16) (Table 1 in this Supplement). New users of caffeine-containing opioids relative to controls were associated with significantly decreased risk of outpatient exacerbations (HR 0.83, 95% CI 0.78-0.89), but increased COPD or pneumonia-related mortality (HR 1.56, 95% CI 1.14-2.13) and all-cause mortality (HR 1.24, 95% CI 1.09-1.40), although the associations with mortality were not as strong as for non-caffeine-containing opioid drugs. No significant associations with other adverse outcomes were observed. Caffeine contained in certain opioid formulations

appears then to provide some protection from opioid-related adverse respiratory events and mortality. The protective effect of caffeine may be related to its stimulating property that may help counteract opioid-related sedating side-effects, and thereby, adverse events possibly related to sedation, like aspiration pneumonia and falls and fractures.

Having excluded individuals with comorbid lung cancer, new opioid users were found to be associated with decreased risk of outpatient exacerbations (HR 0.89, 95% CI 0.84-0.95), but increased risk for ER visits for COPD or pneumonia (HR 1.15, 95% CI 1.01-1.30), COPD or pneumonia-related mortality (HR 2.14, 95% CI 1.60-2.86) and all-cause mortality (HR 1.80, 95% CI 1.59-2.03) relative to controls (Table 2 in this Supplement). No significant associations with other adverse outcomes were observed. When individuals with any pre-existing malignancy were excluded, compared to controls, new opioid users were associated with decreased risk for outpatient exacerbations (HR 0.91, 95% CI 0.85-0.97), but increased risk of ER visits for COPD or pneumonia (HR 1.17, 95% CI 1.02-1.33), COPD or pneumonia-related mortality (HR 2.24, 95% CI 1.66-3.02) and all-cause mortality (HR 1.72, 95% CI 1.51-1.96) (Table 3 in this Supplement). No significant associations with other adverse outcomes were observed. The persistence of increased risk for adverse outcomes among new opioid users with COPD, after having excluding individuals with comorbid malignancy from the analysis (who would be at greater risk for receiving opioids for symptoms, like pain, and who would also be at risk for negative outcomes) supports the robustness of our overall findings. While associations with outpatient respiratory exacerbations were reduced among opioid users relative to controls in these latter two sensitivity analyses, these results are likely explained by the increased and competing risk of death among opioid users.

| Table 1. Hazard ratios and confidence intervals for adverse respiratory outcomes for the propensity score weighted community-dwelling cohort, distinguishing by whether or not the incident opioid was caffeine-containing |                   |                                      |                 |         |                                 |                 |         |                                        |                 |         |                                                              |                 |         |                                     |                 |         |                      |                 |         |
|----------------------------------------------------------------------------------------------------------------------------------------------------------------------------------------------------------------------------|-------------------|--------------------------------------|-----------------|---------|---------------------------------|-----------------|---------|----------------------------------------|-----------------|---------|--------------------------------------------------------------|-----------------|---------|-------------------------------------|-----------------|---------|----------------------|-----------------|---------|
| Opioid drug type                                                                                                                                                                                                           | Opioid use status | Outpatient respiratory exacerbations |                 |         | ER visits for COPD or pneumonia |                 |         | Hospitalizations for COPD or pneumonia |                 |         | ICU admissions during hospitalizations for COPD or pneumonia |                 |         | COPD or pneumonia-related mortality |                 |         | All-cause mortality  |                 |         |
|                                                                                                                                                                                                                            |                   | Number (% of events)                 | HR(95% CI)      | p-value | Number (% of events)            | HR(95% CI)      | p-value | Number (% of events)                   | HR(95% CI)      | p-value | Number (% of events)                                         | HR(95% CI)      | p-value | Number (% of events)                | HR(95% CI)      | p-value | Number (% of events) | HR(95% CI)      | p-value |
|                                                                                                                                                                                                                            |                   |                                      |                 |         |                                 |                 |         |                                        |                 |         |                                                              |                 |         |                                     |                 |         |                      |                 |         |
| <b>Caffeine-containing opioid</b>                                                                                                                                                                                          | New users         | 1984(3.3%)                           | 0.83(0.78,0.89) | <.0001  | 611(1.0%)                       | 1.08(0.95,1.23) | 0.26    | 783(1.3%)                              | 1.01(0.90,1.13) | 0.89    | 115(0.2%)                                                    | 0.95(0.70,1.29) | 0.75    | 129(0.2%)                           | 1.56(1.14,2.13) | 0.005   | 786(1.3%)            | 1.24(1.09,1.40) | 0.0008  |
|                                                                                                                                                                                                                            | Controls          | 1667(4.0%)                           | referent        |         | 399(1.0%)                       | referent        |         | 548(1.3%)                              | referent        |         | 85(0.2%)                                                     | referent        |         | 59(0.1%)                            | referent        |         | 449(1.1%)            | referent        |         |
|                                                                                                                                                                                                                            |                   |                                      |                 |         |                                 |                 |         |                                        |                 |         |                                                              |                 |         |                                     |                 |         |                      |                 |         |
| <b>Non-caffeine-containing opioid</b>                                                                                                                                                                                      | New users         | 1219(4.1%)                           | 0.99(0.91,1.08) | 0.84    | 398(1.3%)                       | 1.31(1.12,1.54) | 0.0008  | 534(1.8%)                              | 1.27(1.10,1.45) | 0.0008  | 80(0.3%)                                                     | 1.16(0.80,1.70) | 0.43    | 144(0.5%)                           | 3.21(2.35,4.40) | <.0001  | 990(3.3%)            | 2.79(2.46,3.16) | <.0001  |
|                                                                                                                                                                                                                            |                   | 1726(4.1%)                           | referent        |         | 428(1.0%)                       | referent        |         | 594(1.4%)                              | referent        |         | 97(0.2%)                                                     | referent        |         | 64(0.2%)                            | referent        |         | 506(1.2%)            | referent        |         |

| <b>Table 2. Hazard ratios and confidence intervals for adverse respiratory outcomes among propensity score weighted community-dwelling cohort, excluding individuals with pre-existing lung cancer</b> |                             |                             |                    |                |  |
|--------------------------------------------------------------------------------------------------------------------------------------------------------------------------------------------------------|-----------------------------|-----------------------------|--------------------|----------------|--|
| <b>Outcomes</b>                                                                                                                                                                                        | <b>Status of opioid use</b> | <b>Number (%) of events</b> | <b>HR (95% CI)</b> | <b>p-value</b> |  |
| <b>Outpatient respiratory exacerbations</b>                                                                                                                                                            | New opioid users            | 3074(3.6%)                  | 0.89(0.84,0.95)    | 0.0006         |  |
|                                                                                                                                                                                                        | Controls                    | 1641(4.0%)                  | referent           |                |  |
| <b>ER visits for COPD or pneumonia</b>                                                                                                                                                                 | New opioid users            | 950(1.1%)                   | 1.15(1.01,1.30)    | 0.04           |  |
|                                                                                                                                                                                                        | Controls                    | 397(1.0%)                   | referent           |                |  |
| <b>Hospitalizations for COPD or pneumonia</b>                                                                                                                                                          | New opioid users            | 1229(1.4%)                  | 1.10(0.99,1.23)    | 0.08           |  |
|                                                                                                                                                                                                        | Controls                    | 534(1.3%)                   | referent           |                |  |
| <b>ICU admissions during hospitalizations for COPD or pneumonia</b>                                                                                                                                    | New opioid users            | 179(0.2%)                   | 1.10(0.83,1.46)    | 0.49           |  |
|                                                                                                                                                                                                        | Controls                    | 77(0.2%)                    | referent           |                |  |
| <b>COPD or pneumonia-related mortality</b>                                                                                                                                                             | New opioid users            | 258(0.3%)                   | 2.14(1.60,2.86)    | <.0001         |  |
|                                                                                                                                                                                                        | Controls                    | 58(0.1%)                    | referent           |                |  |
| <b>All-cause mortality</b>                                                                                                                                                                             | New opioid users            | 1535(1.8%)                  | 1.80(1.59,2.03)    | <.0001         |  |
|                                                                                                                                                                                                        | Controls                    | 410(1.0%)                   | referent           |                |  |

| <b>Table 3. Hazard ratios and confidence intervals for adverse respiratory outcomes among propensity score weighted community-dwelling cohort, excluding individuals with any pre-existing malignancy</b> |                             |                             |                    |                |  |
|-----------------------------------------------------------------------------------------------------------------------------------------------------------------------------------------------------------|-----------------------------|-----------------------------|--------------------|----------------|--|
| <b>Outcomes</b>                                                                                                                                                                                           | <b>Status of opioid use</b> | <b>Number (%) of events</b> | <b>HR (95% CI)</b> | <b>p-value</b> |  |
| <b>Outpatient respiratory exacerbations</b>                                                                                                                                                               | New opioid users            | 2830(3.6%)                  | 0.91(0.85,0.97)    | 0.006          |  |
|                                                                                                                                                                                                           | Controls                    | 1537(4.0%)                  | referent           |                |  |
| <b>ER visits for COPD or pneumonia</b>                                                                                                                                                                    | New opioid users            | 860(1.1%)                   | 1.17(1.02,1.33)    | 0.02           |  |
|                                                                                                                                                                                                           | Controls                    | 367(1.0%)                   | referent           |                |  |
| <b>Hospitalizations for COPD or pneumonia</b>                                                                                                                                                             | New opioid users            | 1117(1.4%)                  | 1.11(0.99,1.24)    | 0.08           |  |
|                                                                                                                                                                                                           | Controls                    | 501(1.3%)                   | referent           |                |  |
| <b>ICU admissions during hospitalizations for COPD or pneumonia</b>                                                                                                                                       | New opioid users            | 168(0.2%)                   | 1.20(0.90,1.61)    | 0.20           |  |
|                                                                                                                                                                                                           | Controls                    | 69(0.2%)                    | referent           |                |  |
| <b>COPD or pneumonia-related mortality</b>                                                                                                                                                                | New opioid users            | 241(0.3%)                   | 2.24(1.66,3.02)    | <.0001         |  |
|                                                                                                                                                                                                           | Controls                    | 54(0.1%)                    | referent           |                |  |
| <b>All-cause mortality</b>                                                                                                                                                                                | New opioid users            | 1244(1.6%)                  | 1.72(1.51,1.96)    | <.0001         |  |
|                                                                                                                                                                                                           | Controls                    | 361(0.9%)                   | referent           |                |  |
